# Supplementary material
Source: Elsevier journal article supplement (https://www.sciencedirect.com/science/article/pii/S2013251416300682)
Supplement: mmc1 [file S2013251416300682:mmc1.doc]

***Material suplementario***

**Informe de resultados y recomendaciones ILERVAS**

Acabado el circuito, se aconsejará al paciente que solicite visita a su centro de salud (enfermería o médico) para recoger los resultados. En el caso que sea derivado directamente al Hospital Universitario Arnau de Vilanova (gabinete de neurología o cirugía vascular) se le explicará que recibirá una carta de citación con día, hora, lugar y motivo de la derivación.

En todos los casos quedará constancia escrita en la historia e-CAP en formato informe y seguimiento clínico, para facilitar el seguimiento por parte del personal de atención primaria. En el informe constaran los resultados y las recomendaciones de acuerdo con las guías de práctica clínica. El médico o la enfermera responsables serán los encargados de dar los resultados y establecer las medidas necesarias, desde modificación del estilo de vida hasta la prescripción de medicamentos par controlar los factores de riesgo. Las imágenes de las ecografías se enviarán informáticamente al archivo general de imágenes del CatSalut, para su archivo y revisión, si se considera, por parte del médico responsable de atención primaria y para comparar en el caso de exploraciones posteriores.

En el mismo informe, y aunque no es motivo del estudio, se hará constar si se detectan anomalías del ritmo cardíaco y alteraciones ecográficas a nivel de tiroides, para valoración y seguimiento por parte de atención primaria.

**Recomendaciones ILERVAS:**

- Índice tobillo-brazo dentro de la normalidad y con ausencia de placa de ateroma: control de factores de riesgo cardiovascular. Cambios en el estilo de vida si procede.
- Presencia de una o más placas de ateroma que no provoca estenosis hemodinámicamente significativa: control-modificación de factores de riesgo y tratamiento en los casos que sea necesario, en función de las guías de práctica clínica: LDL-Colesterol <70 mg/dL, Colesterol no-HDL <130 mg/dL, Triglicéridos <200 mg/dL; TA≤140/90 mm Hg. Valorar tratamiento antiagregante.
- Índice tobillo-brazo <0.7 y/o presencia de una o más placas de ateroma a carótidas que provoca estenosis hemodinámicamente significativa o superior al 50-70%: modificar factores de riesgo cardiovascular. Derivar a especialista para confirmación diagnóstica, tratamiento y seguimiento (cirugía vascular, neurología). Completar estudios. LDL-Colesterol <70 mg/dL, Colesterol no-HDL<130 mg/dL, Triglicéridos <150 mg/dL. TA≤130/80 mm Hg. Tratamiento antiagregante.
- Aneurisma de aorta: si el diámetro es entre 3 y 4 cm se derivará al medico de AP para su valoración y seguimiento. Si el diámetro es superior a 4 cm el paciente se derivará directamente a la consulta de cirugía vascular para confirmación y tratamiento.
- Estenosis intracraneal moderada a grave: derivación a neurología para verificación diagnóstica, valoración, tratamiento y seguimiento si procede.
- Alteración del filtrado glomerular y/o del cociente albúmina/creatinina en orina: según la guía de la Ruta Asistencial de Enfermedad Renal Crónica de Lleida1, se aconsejará visita médica para repetir la analítica de confirmación y hacer la derivación, si es necesario, al servicio de Nefrología del Hospital Universitari Arnau de Vilanova de Lleida.
- Hipercolesterolemia (colesterol ≥ 200 mg/dL): en todos los casos se hará una determinación de HDL-Colesterol, LDLColesterol, triglicéridos y cálculo de Colesterol no-HDL. Se aconsejará visita médica para programar analítica de confirmación y tomar las medidas oportunas si se confirma la alteración. En los casos de sospecha de hipercolesterolemia familiar se aconsejará derivación al servicio de endocrinología del Hospital Universitari Arnau de Vilanova de Lleida.
- Elevación de la hemoglobina glicosilada (HB1Ac ≥ 5.7%): se aconsejará visita médica en Atención Primaria para completar el diagnóstico de diabetes, valorar el inicio de dieta y medicación.
- Elevación del ácido úrico ( >6 mg/dL en mujeres y >7.2 mg/dL en hombres): se aconsejará visita médica en Atención Primaria para analíticas de confirmación, valorar el inicio de dieta y medicación.

**Referencias**

1. Alcázar R, Orte L, González E, Górriz JL, Navarro JF, Martín AL, *et al.* Documento de consenso SEN-semFYC sobre la enfermedad renal crónica. Nefrología 2008; 28: 273–82.
